# Supplementary material
Source: PubMed Central journal article supplement (PMC4448121)
Supplement: NIHMS684405-supplement-Permission_to_reproduce_figure.pdf [file NIHMS684405-supplement-Permission_to_reproduce_figure.pdf]

## WOLTERS KLUWER HEALTH LICENSE TERMS AND CONDITIONS

Dec 08, 2014

---

This is a License Agreement between Gervasio A Lamas ("You") and Wolters Kluwer Health ("Wolters Kluwer Health") provided by Copyright Clearance Center ("CCC"). The license consists of your order details, the terms and conditions provided by Wolters Kluwer Health, and the payment terms and conditions.

**All payments must be made in full to CCC. For payment instructions, please see information listed at the bottom of this form.**

|                                        |                                                                                                                                                                                                                                       |
|----------------------------------------|---------------------------------------------------------------------------------------------------------------------------------------------------------------------------------------------------------------------------------------|
| License Number                         | 3501430784184                                                                                                                                                                                                                         |
| License date                           | Nov 03, 2014                                                                                                                                                                                                                          |
| Licensed content publisher             | Wolters Kluwer Health                                                                                                                                                                                                                 |
| Licensed content publication           | Circulation: Cardiovascular Quality and Outcomes                                                                                                                                                                                      |
| Licensed content title                 | The Effect of an EDTA-based Chelation Regimen on Patients With Diabetes Mellitus and Prior Myocardial Infarction in the Trial to Assess Chelation Therapy (TACT)                                                                      |
| Licensed content author                | Esteban Escolar, Gervasio A. Lamas, Daniel B. Mark, Robin Boineau, Christine Goertz, Yves Rosenberg, Richard L. Nahin, Pamela Ouyang, Theodore Rozema, Allan Magaziner, Richard Nahas, Eldrin F. Lewis, Lauren Lindblad, Kerry L. Lee |
| Licensed content date                  | Dec 31, 1969                                                                                                                                                                                                                          |
| Volume Number                          | 7                                                                                                                                                                                                                                     |
| Issue Number                           | 1                                                                                                                                                                                                                                     |
| Type of Use                            | Journal/Magazine                                                                                                                                                                                                                      |
| Requestor type                         | Not-for-profit                                                                                                                                                                                                                        |
| Format                                 | Print and electronic                                                                                                                                                                                                                  |
| Portion                                | Figures/table/illustration                                                                                                                                                                                                            |
| Number of figures/tables/illustrations | 1                                                                                                                                                                                                                                     |
| Figures/tables/illustrations used      | Figure 2a                                                                                                                                                                                                                             |
| Author of this Wolters Kluwer article  | Yes                                                                                                                                                                                                                                   |
| Will you be translating?               | No                                                                                                                                                                                                                                    |
| Title of new article                   | Chelation Therapy: A New Look at an Old Treatment for Heart Disease, Particularly in Diabetics                                                                                                                                        |
| Publication the new article is in      | Circulation                                                                                                                                                                                                                           |
| Publisher of new article               | Lippincott Williams & Wilkins, Publisher                                                                                                                                                                                              |
| Author of new article                  | Gervasio A. Lamas, MD, FAHA                                                                                                                                                                                                           |

|                                          |                                                                          |
|------------------------------------------|--------------------------------------------------------------------------|
| Expected publication date of new article | Nov 2014                                                                 |
| Estimated size of new article (pages)    | 3                                                                        |
| Billing Type                             | Invoice                                                                  |
| Billing address                          | 4300 Alton Road<br>Suite 2070A<br>MIAMI BEACH, FL 33140<br>United States |
| Total                                    | 0.00 USD                                                                 |

## Terms and Conditions

### Terms and Conditions

1. A credit line will be prominently placed and include the author(s), title of article, title of journal, volume number, issue number and inclusive pages.
2. The requestor warrants that the material shall not be used in any manner which may be considered derogatory to the title, content, or authors of the material, or to Wolters Kluwer.
3. Permission granted is non-exclusive, and is valid throughout the world in the English language and the languages specified in your original request.
4. Wolters Kluwer cannot supply the requestor with the original artwork or a "clean copy."
5. Permission is valid if the borrowed material is original to a Wolters Kluwer imprint (Lippincott-Raven Publishers, Williams & Wilkins, Lea & Febiger, Harwal, Rapid Science, Little Brown & Company, Harper & Row Medical, American Journal of Nursing Co, and Urban & Schwarzenberg - English Language).
6. If you opt not to use the material requested above, please notify RightsLink or Wolters Kluwer Health/Lippincott Williams & Wilkins within 90 days of the original invoice date.
7. This permission does not apply to images that are credited to publications other than Wolters Kluwer journals. For images credited to non-Wolters Kluwer journal publications, you will need to obtain permission from the journal referenced in the figure or table legend or credit line before making any use of the image(s) or table(s).
8. Adaptations are protected by copyright, so if you would like to reuse material that we have adapted from another source, you will need not only our permission, but the permission of the rights holder of the original material. Similarly, if you want to reuse an adaptation of original LWW content that appears in another publisher's work, you will need our permission and that of the next publisher. The adaptation should be credited as follows: Adapted with permission from Lippincott Williams and Wilkins/Wolters Kluwer Health: Book author, title, year of publication or Journal name, article author, title, reference citation, year of publication.
9. **Please note that modification of text within figures or full-text article is strictly forbidden.**
10. Please note that articles in the ahead-of-print stage of publication can be cited and the content may be re-used by including the date of access and the unique DOI number. Any final changes in manuscripts will be made at the time of print publication and will be reflected in the final electronic version of the issue. Disclaimer: Articles appearing in the Published Ahead-of-Print section have been peer-reviewed and accepted for publication in the relevant journal and posted online before print publication. Articles appearing as publish ahead-of-print may contain statements, opinions, and information that have errors in facts, figures, or interpretation. Accordingly, Lippincott Williams & Wilkins, the editors and authors and their respective employees are not responsible or liable for the use of any such inaccurate or misleading data, opinion or information contained in the articles in this section.
11. Permission is granted for a one time use only within 12 months from the date of this invoice. Rights herein do not apply to future reproductions, editions, revisions, or other derivative works. Once the 12-month term has expired, permission to renew must be submitted in writing.
12. The following statement needs to be added when reprinting the material in Open

Access journals only: 'promotional and commercial use of the material in print, digital or mobile device format is prohibited without the permission from the publisher Lippincott Williams & Wilkins. Please contact [journalpermissions@lww.com](mailto:journalpermissions@lww.com) for further information ♦.

13. In case of ***Disease Colon Rectum, Plastic Reconstructive Surgery, The Green Journal, Critical Care Medicine, Pediatric Critical Care Medicine, the American Heart Publications, the American Academy of Neurology*** the following guideline applies: no drug brand/trade name or logo can be included in the same page as the material re-used
14. When requesting a permission to translate a full text article, Wolters Kluwer/Lippincott Williams & Wilkins requests to receive the pdf of the translated document
15. Other Terms and Conditions:

v1.9

Questions? [customer care@copyright.com](mailto:customer care@copyright.com) or +1-855-239-3415 (toll free in the US) or +1-978-646-2777.

**Gratis licenses (referencing \$0 in the Total field) are free. Please retain this printable license for your reference. No payment is required.**

---

---
